# Supplementary material
Source: PubMed Central journal article supplement (PMC3230253)
Supplement: NIHMS336959-supplement-Supplementary_Information.pdf [file NIHMS336959-supplement-Supplementary_Information.pdf]

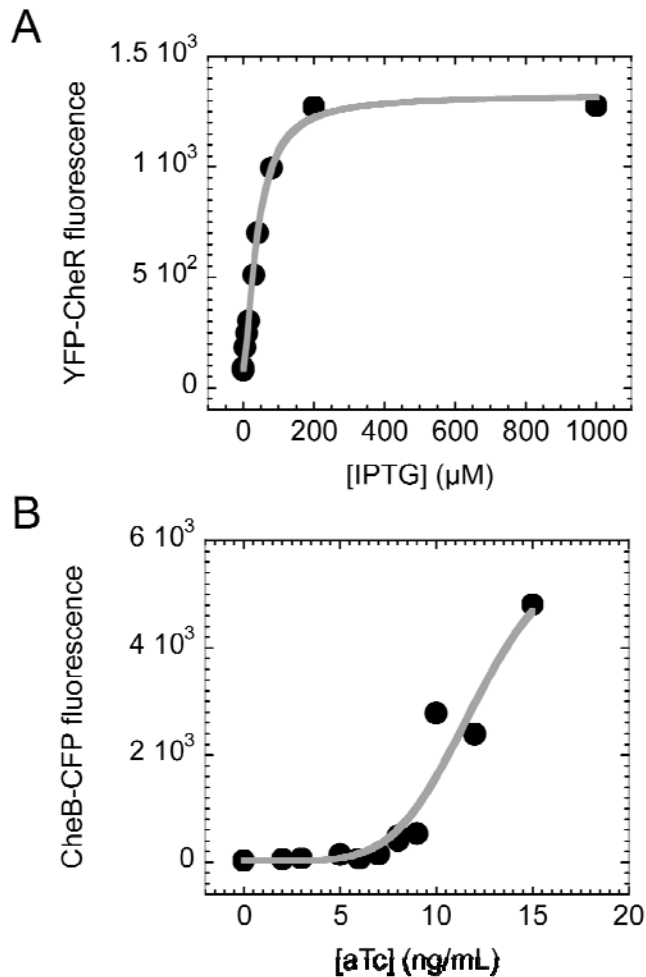

**Fig. S1. Induction curves for YFP-CheR and CheB-CFP for single gene mutants in the capillary assay.** (A) Fluorescence intensity of the YFP-CheR proteins as a function of the concentration of the inducer IPTG used in capillary experiments. The grey line is the best fitted Hill function to the data points:  $A \cdot [\text{IPTG}]^N / ([\text{IPTG}]^N + B^N) + C$ ,  $A=1239.0$ ,  $B=41.1 \mu\text{M}$ ,  $C=84.4$  and  $N=1.5$  with  $R^2=0.99$ . (B) Fluorescence intensity of the CheB-CFP proteins as a function of the concentration of the inducer aTc used in capillary experiments. The grey line is the best fitted Hill function to the data points:  $A \cdot [\text{aTc}]^N / ([\text{aTc}]^N + B^N) + C$ ,  $A=6299.3$ ,  $B=12.3$ ,  $C=24.4$  and  $N=5.3$  with  $R^2=0.92$ .

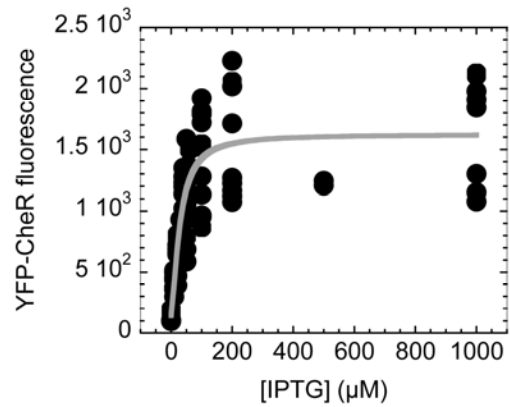

**Fig. S2. The fluorescent intensity of YFP-CheR as a function of [IPTG] in capillary experiments with  $\Delta cheR$ - $\Delta cheB$  cells.**

We measured the fluorescence intensity of YFP-CheR from  $\Delta cheR$ - $\Delta cheB$  cells in the capillary experiments. The grey line is the best fitted Hill function to the data points:  $A \cdot [IPTG]^N / ([IPTG]^N + B^N) + C$ ,  $A=1480.4$ ,  $B=28.8 \mu M$ ,  $C=143.3$  and  $N=1.5$  with  $R^2=0.76$ .

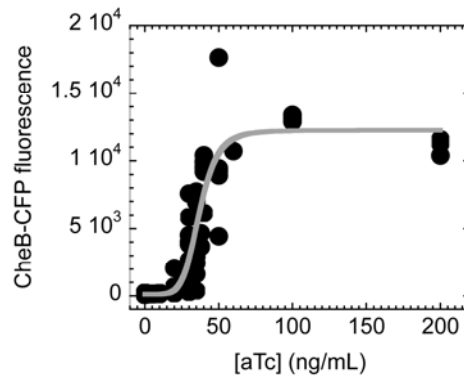

**Fig. S3. The fluorescent intensity of CheB-CFP as a function of [aTc] in capillary experiments with  $\Delta$ CheR- $\Delta$ CheB cells.**

We measured the fluorescence intensity of CheB-CFP from  $\Delta$ *cheR*- $\Delta$ *cheB* cells in the capillary experiments. The grey line is the best fitted Hill function to the data points:  $A \cdot [aTc]^N / ([aTc]^N + B^N) + C$ ,  $A=12129$ ,  $B=37.0$ ,  $C=123.7$  and,  $N=6.0$  with  $R^2=0.83$ .
